# Supplementary material for: Anaplastic Lymphoma Kinase (ALK) in Posterior Cranial Fossa Tumors: A Scoping Review of Diagnostic, Prognostic, and Therapeutic Perspectives
Source: Cancers (Basel). 2024 Feb 2;16(3):650. doi: 10.3390/cancers16030650 (PMC10854950; doi:10.3390/cancers16030650)
Supplement: Supplementary file 1 [file cancers-16-00650-s001.zip]

Archive with 4 entries (4 files):
- Supplementary File S1.xlsx
- __MACOSX/._Supplementary File S1.xlsx
- Supplementary File S2.pdf
- __MACOSX/._Supplementary File S2.pdf
