# Supplementary material for: Anaplastic Lymphoma Kinase (ALK) in Posterior Cranial Fossa Tumors: A Scoping Review of Diagnostic, Prognostic, and Therapeutic Perspectives
Source: Cancers (Basel). 2024 Feb 2;16(3):650. doi: 10.3390/cancers16030650 (PMC10854950; doi:10.3390/cancers16030650)
Supplement: Supplementary file 1 [file cancers-16-00650-s001.zip › Supplementary File S1.xlsx]

## Sheet: Sheet1 (2)
PubMed algorithm	Scopus algorithm
(choroid plexus[MeSH Terms] OR "choroid plexus") AND (Anaplastic Lymphoma Kinase[MeSH Terms] OR ALK)	TITLE-ABS-KEY ( "choroid plexus" ) AND TITLE-ABS-KEY ( alk OR "anaplastic lymphoma kinase" )
(medulloblastoma[MeSH Terms] OR "medulloblastoma") AND (Anaplastic Lymphoma Kinase[MeSH Terms] OR ALK)	TITLE-ABS-KEY ( "medulloblastoma" ) AND TITLE-ABS-KEY ( alk OR "anaplastic lymphoma kinase" )
(neuroblastoma[MeSH Terms] OR "neuroblastoma") AND (Anaplastic Lymphoma Kinase[MeSH Terms] OR ALK) AND (intracranial OR intra-cranial OR "central nervous" OR CNS OR Central Nervous System[MeSH Terms] OR Central Nervous System Neoplasms[MeSH Terms] OR brain[MeSH Terms] OR brain OR cranial OR cerebr* OR encephal* OR spinal cord[MeSH Terms] OR spinal cord neoplasms[MeSH Terms] OR "spinal cord")	( TITLE-ABS-KEY ( neuroblastoma ) AND TITLE-ABS-KEY ( "anaplastic lymphoma kinase" OR alk ) AND TITLE-ABS-KEY ( intracranial OR "intra-cranial" OR "central nervous" OR CNS OR "central nervous system" OR "central nervous system neoplasms" OR brain OR cranial OR cerebr* OR encephal* OR "spinal cord" OR "spinal cord neoplasms" OR "spinal cord" ) )
(atypical teratoid tumor[MeSH Terms] OR "teratoid tumor" OR "rhabdoid tumor") AND (Anaplastic Lymphoma Kinase[MeSH Terms] OR ALK)	( TITLE-ABS-KEY ( "atypical teratoid tumor" OR "teratoid tumor" OR "rhabdoid tumor" ) AND TITLE-ABS-KEY ( "anaplastic lymphoma kinase" OR alk ) )
(cribriform neuroepithelial tumor[MeSH Terms] OR "cribriform neuroepithelial tumor") AND (Anaplastic Lymphoma Kinase[MeSH Terms] OR ALK)	( TITLE-ABS-KEY ( cribriform AND neuroepithelial AND tumor ) AND TITLE-ABS-KEY ( alk OR "anaplastic lymphoma kinase" ) )
(embryonal tumor with multilayered rosettes[MeSH Terms] OR "embryonal tumor with multilayered rosettes") AND (Anaplastic Lymphoma Kinase[MeSH Terms] OR ALK) AND (intracranial OR intra-cranial OR "central nervous" OR CNS OR Central Nervous System[MeSH Terms] OR Central Nervous System Neoplasms[MeSH Terms] OR brain[MeSH Terms] OR brain OR cranial OR cerebr* OR encephal* OR spinal cord[MeSH Terms] O…	( TITLE-ABS-KEY ( "embryonal tumor with multilayered rosettes" ) AND TITLE-ABS-KEY ( "anaplastic lymphoma kinase" OR alk ) AND TITLE-ABS-KEY ( intracranial OR "intra-cranial" OR "central nervous" OR CNS OR "central nervous system" OR "central nervous system neoplasms" OR brain OR cranial OR cerebr* OR encephal* OR "spinal cord" OR "spinal cord neoplasms" OR "spinal cord" ) )
(CNS tumor with BCOR internal tandem duplication[MeSH Terms] OR "CNS tumor with BCOR internal tandem duplication") AND (Anaplastic Lymphoma Kinase[MeSH Terms] OR ALK)	TITLE-ABS-KEY ( "CNS tumor with BCOR internal tandem duplication" ) AND TITLE-ABS-KEY ( alk OR "anaplastic lymphoma kinase" )
(pineal[MeSH Terms] OR "pineal") AND (Anaplastic Lymphoma Kinase[MeSH Terms] OR ALK)	TITLE-ABS-KEY ( "pineal" ) AND TITLE-ABS-KEY ( alk OR "anaplastic lymphoma kinase" )
(pineocytoma[MeSH Terms] OR "pineocytoma") AND (Anaplastic Lymphoma Kinase[MeSH Terms] OR ALK)	TITLE-ABS-KEY ( "pineocytoma" ) AND TITLE-ABS-KEY ( alk OR "anaplastic lymphoma kinase" )
(pineoblastoma[MeSH Terms] OR "pineoblastoma") AND (Anaplastic Lymphoma Kinase[MeSH Terms] OR ALK)	TITLE-ABS-KEY ( "pineoblastoma" ) AND TITLE-ABS-KEY ( alk OR "anaplastic lymphoma kinase" )
(schwannoma[MeSH Terms] OR "schwannoma") AND (Anaplastic Lymphoma Kinase[MeSH Terms] OR ALK)	TITLE-ABS-KEY ( "schwannoma" ) AND TITLE-ABS-KEY ( alk OR "anaplastic lymphoma kinase" )
(neurofibroma[MeSH Terms] OR "neurofibroma") AND (Anaplastic Lymphoma Kinase[MeSH Terms] OR ALK)	TITLE-ABS-KEY ( "neurofibroma" ) AND TITLE-ABS-KEY ( alk OR "anaplastic lymphoma kinase" )
(perineurioma[MeSH Terms] OR "perineurioma") AND (Anaplastic Lymphoma Kinase[MeSH Terms] OR ALK)	TITLE-ABS-KEY ( "perineurioma" ) AND TITLE-ABS-KEY ( alk OR "anaplastic lymphoma kinase" )
(nerve sheath tumor[MeSH Terms] OR "nerve sheath tumor") AND (Anaplastic Lymphoma Kinase[MeSH Terms] OR ALK)	( TITLE-ABS-KEY ( nerve AND sheath AND tumor ) AND TITLE-ABS-KEY ( alk OR "anaplastic lymphoma kinase" ) )
(paraganglioma[MeSH Terms] OR "paraganglioma") AND (Anaplastic Lymphoma Kinase[MeSH Terms] OR ALK)	TITLE-ABS-KEY ( "paraganglioma" ) AND TITLE-ABS-KEY ( alk OR "anaplastic lymphoma kinase" )
(meningioma[MeSH Terms] OR "meningioma") AND (Anaplastic Lymphoma Kinase[MeSH Terms] OR ALK)	TITLE-ABS-KEY ( "meningioma" ) AND TITLE-ABS-KEY ( alk OR "anaplastic lymphoma kinase" )
(fibroblastic[MeSH Terms] OR "fibroblastic") AND (Anaplastic Lymphoma Kinase[MeSH Terms] OR ALK)	TITLE-ABS-KEY ( "fibroblastic" ) AND TITLE-ABS-KEY ( alk OR "anaplastic lymphoma kinase" )
("solitary fibrous tumor"[MeSH Terms] OR "solitary fibrous tumor") AND (Anaplastic Lymphoma Kinase[MeSH Terms] OR ALK)	( TITLE-ABS-KEY ( "solitary fibrous tumor" ) AND TITLE-ABS-KEY ( "anaplastic lymphoma kinase" OR alk ) )
(hemangioma[MeSH Terms] OR "hemangioma") AND (Anaplastic Lymphoma Kinase[MeSH Terms] OR ALK)	TITLE-ABS-KEY ( "hemangioma" ) AND TITLE-ABS-KEY ( alk OR "anaplastic lymphoma kinase" )
(hemangioblastoma[MeSH Terms] OR "hemangioblastoma") AND (Anaplastic Lymphoma Kinase[MeSH Terms] OR ALK)	TITLE-ABS-KEY ( "hemangioblastoma" ) AND TITLE-ABS-KEY ( alk OR "anaplastic lymphoma kinase" )
(rhabdomyosarcoma[MeSH Terms] OR "rhabdomyosarcoma") AND (Anaplastic Lymphoma Kinase[MeSH Terms] OR ALK)	TITLE-ABS-KEY ( "rhabdomyosarcoma" ) AND TITLE-ABS-KEY ( alk OR "anaplastic lymphoma kinase" )
("intracranial mesenchymal tumor"[MeSH Terms] OR "intracranial mesechymal tumor") AND (Anaplastic Lymphoma Kinase[MeSH Terms] OR ALK)	TITLE-ABS-KEY ( "intracranial mesenchymal tumor" ) AND TITLE-ABS-KEY ( alk OR "anaplastic lymphoma kinase" )
("sarcoma"[MeSH Terms] OR "sarcoma"[All Fields]) AND ("anaplastic lymphoma kinase"[MeSH Terms] OR "ALK"[All Fields]) AND (intracranial OR intra-cranial OR "central nervous" OR CNS OR Central Nervous System[MeSH Terms] OR Central Nervous System Neoplasms[MeSH Terms] OR brain[MeSH Terms] OR brain OR cranial OR cerebr* OR encephal* OR spinal cord[MeSH Terms] OR spinal cord neoplasms[MeSH Terms] OR "…	( TITLE-ABS-KEY ( "sarcoma" ) AND TITLE-ABS-KEY ( "anaplastic lymphoma kinase" OR alk ) AND TITLE-ABS-KEY ( intracranial OR "intra-cranial" OR "central nervous" OR cns OR "central nervous system" OR "central nervous system neoplasms" OR brain OR cranial OR cerebr* OR encephal* OR "spinal cord" OR "spinal cord neoplasms" OR "spinal cord" ) )
("chondrogenic tumor"[MeSH Terms] OR "chondrogenic tumor") AND (Anaplastic Lymphoma Kinase[MeSH Terms] OR ALK)	TITLE-ABS-KEY ( "chondrogenic tumor" ) AND TITLE-ABS-KEY ( alk OR "anaplastic lymphoma kinase" )
(chondrosarcoma[MeSH Terms] OR "chondrosarcoma") AND (Anaplastic Lymphoma Kinase[MeSH Terms] OR ALK)	TITLE-ABS-KEY ( "chondrosarcoma" ) AND TITLE-ABS-KEY ( alk OR "anaplastic lymphoma kinase" )
(notochordal[MeSH Terms] OR "notochordal") AND (Anaplastic Lymphoma Kinase[MeSH Terms] OR ALK)	( TITLE-ABS-KEY ( "notochordal" ) AND TITLE-ABS-KEY ( "anaplastic lymphoma kinase" OR alk ) )
(chordoma[MeSH Terms] OR "chordoma") AND (Anaplastic Lymphoma Kinase[MeSH Terms] OR ALK)	TITLE-ABS-KEY ( "chordoma" ) AND TITLE-ABS-KEY ( alk OR "anaplastic lymphoma kinase" )
("meningeal melanocytic"[MeSH Terms] OR "meningeal melanocytic"") AND (Anaplastic Lymphoma Kinase[MeSH Terms] OR ALK)	TITLE-ABS-KEY ( "meningeal melanocytic" ) AND TITLE-ABS-KEY ( alk OR "anaplastic lymphoma kinase" )
("meningeal melanocytoma"[MeSH Terms] OR "meningeal melanocytoma") AND (Anaplastic Lymphoma Kinase[MeSH Terms] OR ALK)	TITLE-ABS-KEY ( "meningeal melanocytoma" ) AND TITLE-ABS-KEY ( alk OR "anaplastic lymphoma kinase" )
("meningeal melanoma"[MeSH Terms] OR "meningeal melanoma") AND (Anaplastic Lymphoma Kinase[MeSH Terms] OR ALK)	TITLE-ABS-KEY ( "menigeal melanoma" ) AND TITLE-ABS-KEY ( alk OR "anaplastic lymphoma kinase" )
(granulomatosis[MeSH Terms] OR "granulomatosis") AND (Anaplastic Lymphoma Kinase[MeSH Terms] OR ALK)	TITLE-ABS-KEY ( "granulomatosis" ) AND TITLE-ABS-KEY ( alk OR "anaplastic lymphoma kinase" )
("anaplastic large cell lymphoma"[MeSH Terms] OR "anaplastic large cell lymphoma") AND (Anaplastic Lymphoma Kinase[MeSH Terms] OR ALK) AND (intracranial OR intra-cranial OR "central nervous" OR CNS OR Central Nervous System[MeSH Terms] OR Central Nervous System Neoplasms[MeSH Terms] OR brain[MeSH Terms] OR brain OR cranial OR cerebr* OR encephal* OR spinal cord[MeSH Terms] OR spinal cord neoplasm…	( TITLE-ABS-KEY ( "anaplastic large cell lymphoma" ) AND TITLE-ABS-KEY ( "anaplastic lymphoma kinase" OR alk ) AND TITLE-ABS-KEY ( intracranial OR "intra-cranial" OR "central nervous" OR cns OR "central nervous system" OR "central nervous system neoplasms" OR brain OR cranial OR cerebr* OR encephal* OR "spinal cord" OR "spinal cord neoplasms" OR "spinal cord" ) )
("Erdheim-Chester"[MeSH Terms] OR "Erdheim-Chester") AND (Anaplastic Lymphoma Kinase[MeSH Terms] OR ALK)	TITLE-ABS-KEY ( "Erdheim-Chester" ) AND TITLE-ABS-KEY ( alk OR "anaplastic lymphoma kinase" )
("Rosai-Dorfan"[MeSH Terms] OR "Rosai-Dorfan") AND (Anaplastic Lymphoma Kinase[MeSH Terms] OR ALK)	TITLE-ABS-KEY ( "Rosai-Dorfman" ) AND TITLE-ABS-KEY ( alk OR "anaplastic lymphoma kinase" )
(xanthogranuloma[MeSH Terms] OR "xanthogranuloma") AND (Anaplastic Lymphoma Kinase[MeSH Terms] OR ALK)	TITLE-ABS-KEY ( "xanthogranuloma" ) AND TITLE-ABS-KEY ( alk OR "anaplastic lymphoma kinase" )
("Langerhans cell histiocytosis"[MeSH Terms] OR "Langerhans cell histiocytosis") AND (Anaplastic Lymphoma Kinase[MeSH Terms] OR ALK)	TITLE-ABS-KEY ( "Langerhans cell histiocytosis" ) AND TITLE-ABS-KEY ( alk OR "anaplastic lymphoma kinase" )
("histiocytic sarcoma"[MeSH Terms] OR "histiocytic sarcoma") AND (Anaplastic Lymphoma Kinase[MeSH Terms] OR ALK)	TITLE-ABS-KEY ( "histiocytic sarcoma" ) AND TITLE-ABS-KEY ( alk OR "anaplastic lymphoma kinase" )
(teratoma[MeSH Terms] OR "teratoma") AND (Anaplastic Lymphoma Kinase[MeSH Terms] OR ALK)	TITLE-ABS-KEY ( "teratoma" ) AND TITLE-ABS-KEY ( alk OR "anaplastic lymphoma kinase" )
(germinoma[MeSH Terms] OR "germinoma") AND (Anaplastic Lymphoma Kinase[MeSH Terms] OR ALK)	TITLE-ABS-KEY ( "germinoma" ) AND TITLE-ABS-KEY ( alk OR "anaplastic lymphoma kinase" )
("embryonal carcinoma"[MeSH Terms] OR "embryonal carcinoma") AND (Anaplastic Lymphoma Kinase[MeSH Terms] OR ALK)	TITLE-ABS-KEY ( "embryonal carcinoma" ) AND TITLE-ABS-KEY ( alk OR "anaplastic lymphoma kinase" )
("yolk sac"[MeSH Terms] OR "yolk sac") AND (Anaplastic Lymphoma Kinase[MeSH Terms] OR ALK)	TITLE-ABS-KEY ( "yolk sac" ) AND TITLE-ABS-KEY ( alk OR "anaplastic lymphoma kinase" )
(choriocarcinoma[MeSH Terms] OR "choriocarcinoma") AND (Anaplastic Lymphoma Kinase[MeSH Terms] OR ALK)	TITLE-ABS-KEY ( "choriocarcinoma" ) AND TITLE-ABS-KEY ( alk OR "anaplastic lymphoma kinase" )
("mixed germ"[MeSH Terms] OR "mixed germ") AND (Anaplastic Lymphoma Kinase[MeSH Terms] OR ALK)	TITLE-ABS-KEY ( "mixed germ" ) AND TITLE-ABS-KEY ( alk OR "anaplastic lymphoma kinase" )
(craniopharyngioma[MeSH Terms] OR "craniopharyngioma") AND (Anaplastic Lymphoma Kinase[MeSH Terms] OR ALK)	TITLE-ABS-KEY ( "craniopharyngioma" ) AND TITLE-ABS-KEY ( alk OR "anaplastic lymphoma kinase" )
(pituicytoma[MeSH Terms] OR "pituicytoma") AND (Anaplastic Lymphoma Kinase[MeSH Terms] OR ALK)	TITLE-ABS-KEY ( "pituicytoma" ) AND TITLE-ABS-KEY ( alk OR "anaplastic lymphoma kinase" )
(pituitary[MeSH Terms] OR "pituitary") AND (Anaplastic Lymphoma Kinase[MeSH Terms] OR ALK)	TITLE-ABS-KEY ( "pituitary" ) AND TITLE-ABS-KEY ( alk OR "anaplastic lymphoma kinase" )
